# Supplementary material for: The Non-Specific Lethal (NSL) Histone Acetyltransferase Complex Transcriptionally Regulates Yin Yang 1-Mediated Cell Proliferation in Human Cells
Source: MDPI journal article supplement (doi:10.3390/ijms23073801), 2022-03-30
Supplement: s1 [file s1]

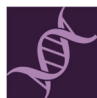

Supplementary Materials

# The Non-Specific Lethal (NSL) Histone Acetyltransferase Complex Transcriptionally Regulates Yin Yang 1-Mediated Cell Proliferation in Human Cells

Hongsen Liu <sup>1</sup>, Tao Wei <sup>1</sup>, Lin Sun <sup>1</sup>, Tingting Wu <sup>1</sup>, Fuqiang Li <sup>1,2</sup>, Jianlei Zhao <sup>1</sup>, Jinneng Chu <sup>1</sup>, Fei Wang <sup>1</sup>, Yong Cai <sup>1,2,\*</sup> and Jingji Jin <sup>1,2,\*</sup>

<sup>1</sup> School of Life Sciences, Jilin University, Changchun 130012, China; liuhs17@mails.jlu.edu.cn (H.L.); taowei16@mails.jlu.edu.cn (T.W.); linsun19@mails.jlu.edu.cn (L.S.); ttwu18@mails.jlu.edu.cn (T.W.); lifq20@mails.jlu.edu.cn (F.L.); jianlei20@mails.jlu.edu.cn (J.Z.); chujm21@mails.jlu.edu.cn (J.C.); fei@jlu.edu.cn (F.W.)

<sup>2</sup> School of Pharmacy, Changchun University of Chinese Medicine, Changchun 130117, China

\* Correspondence: caiyong62@jlu.edu.cn (Y.C.); jjjin@jlu.edu.cn (J.J.); Tel: +86-431-8515-5132 (Y.C.); +86-431-8515-5475 (J.J.)

**Citation:** Liu, H.; Wei, T.; Sun, L.; Wu, T.; Li, F.; Zhao, J.; Chu, J.; Wang, F.; Cai, Y.; Jin, J. The Non-Specific Lethal (NSL) Histone Acetyltransferase Complex Transcriptionally Regulates Yin Yang 1-Mediated Cell Proliferation in Human Cells. *Int. J. Mol. Sci.* **2022**, *23*, 3801. <https://doi.org/10.3390/ijms23073801>

Academic Editor: Petros Kolovos

Received: 6 February 2022

Accepted: 28 March 2022

Published: 30 March 2022

**Publisher's Note:** MDPI stays neutral with regard to jurisdictional claims in published maps and institutional affiliations.

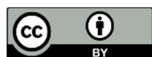

**Copyright:** © 2022 by the authors. Licensee MDPI, Basel, Switzerland. This article is an open access article distributed under the terms and conditions of the Creative Commons Attribution (CC BY) license (<https://creativecommons.org/licenses/by/4.0/>).

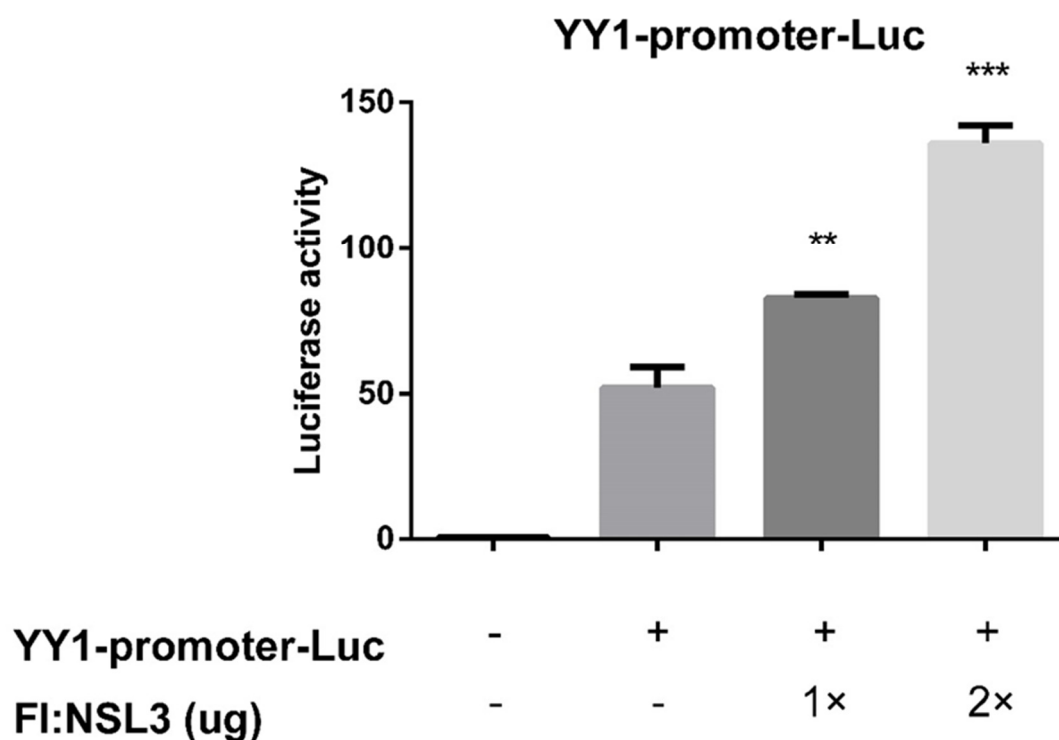

**Figure S1.** Effects of NSL3 on the luciferase activities of YY1. The YY1 promoter region (−97bp to +203bp) was subcloned into the pGL3-vector, and 293T cells were then co-transfected with pGL3-YY1-Luc and Flag-tagged NSL3. Dual luciferase activities were measured at 48 h. \*\*  $p < 0.01$ , and \*\*\*  $p < 0.001$  as compared with basal activity (Student's t-test).
